# Supplementary material
Source: PubMed Central journal article supplement (PMC6730552)
Supplement: NIHMS1046282-supplement-1.pdf [file NIHMS1046282-supplement-1.pdf]

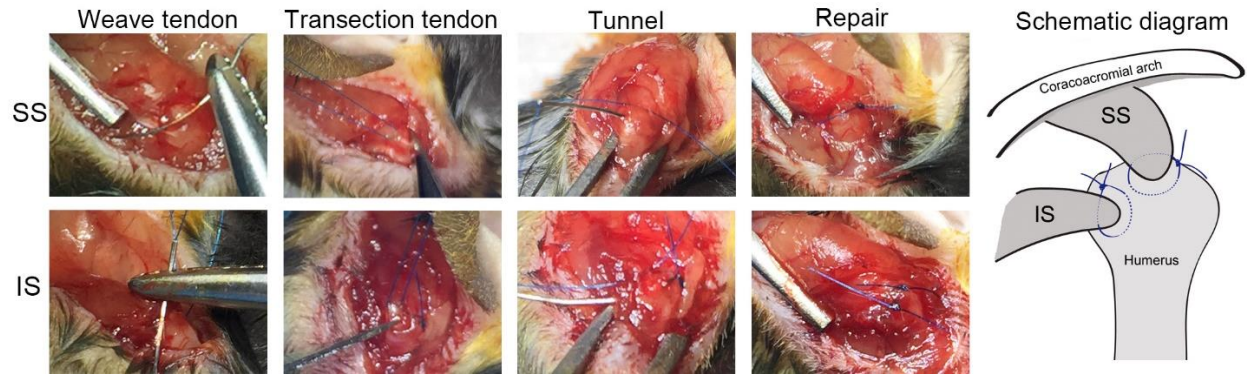

**Supplement 1.** SS and IS tendons repair surgery procedure: The first step to weave and transection of the tendon; the second is to make a tunnel through humeral head and to fix to the anatomical position. For delayed repair surgery, tendons were isolated and cleaned by removing surround scar tissue before being sutured to humeral head.

| Gene        | Forward Primer Sequence (5' →3' ) | Reverse Primer Sequence (5' →3' ) |
|-------------|-----------------------------------|-----------------------------------|
| Atrogin-1   | CCATCAGGAGAAGTGGATCTATGTT         | GCTTCCCCAAAGTGCAGTA               |
| MuRF-1      | TGTTCTGGTAGGTCGTTCCG              | ATGCCGGTCCATGATCACTT              |
| α-SMA       | GGACGTACAACCTGGTATTGTGC           | TCGGCAGTAGTCACGAAGGA              |
| Collagen 1a | GCTCCTCTTAGGGGCCACT               | ATTGGGGACCCTTAGGCCAT              |
| Collagen 3a | CAGGACCTAAGGGCGAAGATG             | TCCGGGCATACCCCGTATC               |
| PPAR-g1     | TCGCTGATGCACTGCCTATG              | GAGAGGTCCACAGAGCTGATT             |
| PPAR-g2     | GGAAGACCACTCGCATTCTT              | GTAATCAGCAACCATTGGGTCA            |
| CEBP-a      | GCGGGAACGCAACAACATC               | GTCCTGGTCAACTCCAGCAC              |
| ADIPOQ      | GTTCCCAATGTACCCATTTCGC            | TGTTGCAGTAGAACTTGCCAG             |

---

**Supplement 2. Sequence of Murine Genes Primers**
